# Supplementary material
Source: Springer Nature journal article supplement (https://www.springermedizin.de/resource/supplementary/12876_2012_916_MOESM2_ESM.pdf/9438060)
Supplement: MOESM2 [file 9438060]

## Enrollment

Assessed for eligibility (n=120)

Not meeting inclusion criteria  
(n=13)

Randomized (n=107)

## Allocation

Allocated to active probiotic (n= 55)  
Received allocated intervention (n= 55)

Allocated to placebo probiotic (n= 52)  
Received allocated intervention (n= 52)

## Follow-Up

Lost to follow-up (n=1) refused medication  
Discontinued intervention (n=3) noncompliance

Discontinued intervention (n=3) noncompliance

## Analysis

Included in analysis (n=51)

Included in analysis (n=49)
